# Supplementary material
Source: PubMed Central journal article supplement (PMC7508681)
Supplement: mmc1.pdf [file mmc1.pdf]

## Supplementary Tables for Section 4.2 Identified Inconsistency, Incongruency, and Insufficiency in Critical Preventative Messages

**Supplementary Table 1.** Examples of tweets on wearing masks

| Time  | Agency | Tweets                                                                                                                                                                                                                                                                |
|-------|--------|-----------------------------------------------------------------------------------------------------------------------------------------------------------------------------------------------------------------------------------------------------------------------|
| 02/04 | CDC    | "CDC does not currently recommend the use of facemasks to help prevent novel #coronavirus. #2019nCoV is not spreading in communities in the US..."                                                                                                                    |
| 04/03 | CDC    | "The cloth face coverings recommended to slow spread of #COVID19 are not surgical masks or N-95 respirators. Those critical supplies must continue to be reserved for healthcare workers and other medical first responders, as recommended by current CDC guidance." |
| 04/04 | CDC    | "#DYK? CDC's recommendation on wearing a cloth face covering may help protect the most vulnerable from #COVID19..."                                                                                                                                                   |
| 04/05 | CDC    | "Take action to slow the spread of #COVID19 by wearing a cloth face covering in public spaces..."                                                                                                                                                                     |
| 03/03 | PA DOH | "RT ...Surgical masks don't provide YOU respiratory protection against diseases like #Coronavirus. They protect others from YOUR cough..."                                                                                                                            |
| 04/10 | PA DOH | "Thank you for helping to stop the spread of #COVID19 by wearing a mask when you leave your home!"                                                                                                                                                                    |

**Supplementary Table 2.** Examples of tweets on risk assessment

| Time  | Agency | Tweets                                                                                                                                                                                                                                                        |
|-------|--------|---------------------------------------------------------------------------------------------------------------------------------------------------------------------------------------------------------------------------------------------------------------|
| 01/23 | WA DOH | "RT @KCPubHealth: Even though we have had one case of novel coronavirus in Washington, the risk of exposure to this new virus is low..."                                                                                                                      |
| 01/28 | RI DOH | " While #coronavirus is getting all the attention, the flu is still widespread in RI. @RIHEALTH says there have been 7 deaths & 273 hospitalizations this flu season. "                                                                                       |
| 01/28 | CDC    | "While CDC considers #2019nCoV a serious situation and is taking preparedness measures, the immediate risk in the U.S. is considered low."                                                                                                                    |
| 02/25 | WA DOH | "RT @KCPubHealth: At this time, the local risk level for #COVID19 is low. However, it is increasingly likely that a worldwide spread will reach the US."                                                                                                      |
| 02/28 | CDC    | "#CDCTRAVELNOTICE: There are cases in #Japan of ongoing community spread (not travel-related) of #COVID19. Older people and people with chronic medical conditions should consider postponing nonessential travel to Japan."                                  |
| 03/11 | PA DOH | "Older adults + people w/ severe chronic medical conditions seem to be at higher risk for more serious #COVID19"                                                                                                                                              |
| 03/19 | ME DOH | "In today's @COVID19 briefing, I mentioned new data on hospitalizations among younger people. For transparency, here are the data I referenced. Of note, among 508 US patients who were hospitalized, 38% were between 20-54..."                              |
| 03/19 | SD     | "Young adults ARE NOT immune to #COVID19. 29% of cases in the US are 20-44-year-olds & 20% of this age group have been admitted to an ICU..."                                                                                                                 |
| 02/25 | CDC    | "Currently there are very few cases of #COVID19 in the US & no reported community spread. But as more countries see community spread, successful containment becomes harder and CDC is preparing for community spread in the US."                             |
| 02/25 | CDC    | "There is currently no reported community spread of #COVID19 in the US. People should follow everyday measures to prevent the spread of respiratory viruses..." "                                                                                             |
| 02/29 | CDC    | "Reports of community spread of #COVID19 in California, Oregon & Washington raise concern about the immediate threat for COVID-19 for certain communities in the US. However, most people in the U.S. have little immediate risk of exposure to the virus..." |

**Supplementary Table 3.** Examples of tweets about stay at home

| Time  | Agency | Tweets                                                                                                            |
|-------|--------|-------------------------------------------------------------------------------------------------------------------|
| 03/04 | ND DOH | "Travelers returning from China, Iran, Italy and Korea should stay home for 14 days to self-monitor for COVID-19" |

|       |        |                                                                                                                                                                                                        |
|-------|--------|--------------------------------------------------------------------------------------------------------------------------------------------------------------------------------------------------------|
| 03/05 | CDC    | "If you are possibly exposed to #COVID19 and told by your healthcare provider or a public health worker to stay home for 14 days, unless you need medical care, please follow their recommendation..." |
| 03/15 | ID DOH | "STAY AT HOME SUNDAY: Find fun things to do inside today with your family. Baking, Scavenger Hunts, Movie Day"                                                                                         |
| 03/16 | GA DOH | "Stay home and watch YouTube with your cats. #SocialDistancing #COVID19 #COVID19OhioReady #QuarantineCats"                                                                                             |
| 03/16 | NM DOH | "Every New Mexican must work together to stem the spread of COVID-19. Please stay home (especially if you are sick)."                                                                                  |
| 03/17 | PA DOH | " Help us #FlattenTheCurve—stay calm, stay home, stay safe. Let's work together NOW to stop the spread of #COVID19.."                                                                                  |
| 03/17 | NY DOH | "Help reduce the spread of #Coronavirus to keep yourself and your community healthy. - Stay home as much as possible"                                                                                  |
| 03/21 | NJ DOH | "COVID-19 UPDATE ♠ @GovMurphy signed an executive order today directing all NJ residents to stay home until further notice."                                                                           |
| 03/21 | ID DOH | "RT @GovPritzker: Today at 5pm, the Stay at Home order will formally take effect."                                                                                                                     |
| 03/22 | OH DOH | "RT @GovMikeDeWine: Full #StayHome order below. #StayHomeOhio #InThisTogetherOhio #COVID19OhioReady"                                                                                                   |
| 03/22 | KS DOH | "We understand that there are lot of questions about Johnson County's stay at home order for #COVID19. We just posted information at the following link..."                                            |
| 03/26 | NJ DOH | "COVID-19 UPDATE School districts to remain closed through at least April 17"                                                                                                                          |
| 03/27 | NH DOH | "ICYMI: Governor Sununu has released #COVID19 Emergency Order 17, mandating the closure of all non-essential business"                                                                                 |
| 03/31 | ID DOH | "The Stay at Home Order has been extended until the end of April. We must #StayHome to say lives and reduce spread"                                                                                    |
| 04/03 | LA DOH | "RT @LouisianaGov: Today, I formally extended the Stay at Home order until April 30, as Louisiana works to slow the spread of COVID-19."                                                               |
| 04/10 | CMS    | "RT @SeemaCMS: We clarified some of our rules so that if a beneficiary has to stay at home due to #COVID19 but needs care..."                                                                          |

**Supplementary Table 4.** Examples of tweets about using disinfectants and sanitizers.

| Time  | Agency | Tweets                                                                                                                                                                                                                                                       |
|-------|--------|--------------------------------------------------------------------------------------------------------------------------------------------------------------------------------------------------------------------------------------------------------------|
| 03/03 | DE     | "#Coronavirus prep: Clean surfaces and objects that you touch frequently at home, work or school..."                                                                                                                                                         |
| 03/05 | IDSA   | "While cleaning products may help prevent the spread of #COVID19, they must be used correctly. 'Some of these [products] don't work by contact,' says IDSA spokesperson Dr. Aaron Glatt. 'They work by being on the surface for a while & drying via air.' " |
| 03/23 | MN     | "Want to make sure you are getting the most out of your hand sanitizer? We have a video for that!"                                                                                                                                                           |
| 03/28 | FDA    | "During this #coronavirus pandemic, poison control centers have had an increase in calls about accidental ingestion of hand sanitizer..."                                                                                                                    |
| 04/15 | FDA    | "RT @DrWoodcockFDA: In Mar 2020 (during #COVID19), calls to Poison Control related to #handsanitizer increased by 79% vs. Mar 2019..."                                                                                                                       |
| 04/24 | ID     | "RT @GovPritzker: Do not inject or ingest disinfectants to cure coronavirus. You will cause serious harm to yourself..."                                                                                                                                     |
| 04/24 | NM     | "DO NOT ingest or inject Lysol or any other disinfectant as a treatment for #COVID19..."                                                                                                                                                                     |
